# Supplementary material for: Identification and characterization of alternative STK39 transcripts within human and mouse kidneys reveals species‐specific regulation of blood pressure
Source: PubMed Central journal article supplement (PMC7048380; doi:10.14814/phy2.14379), 2020-02-28

# S1A

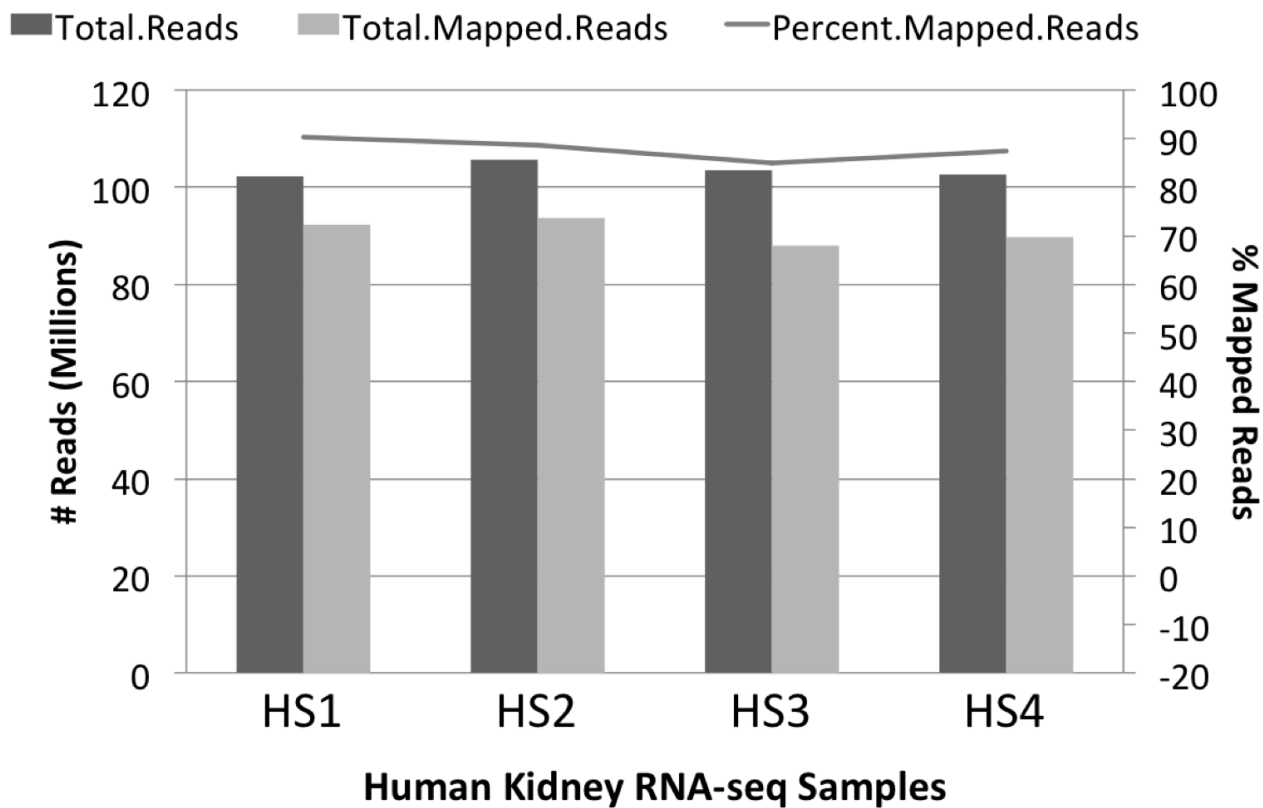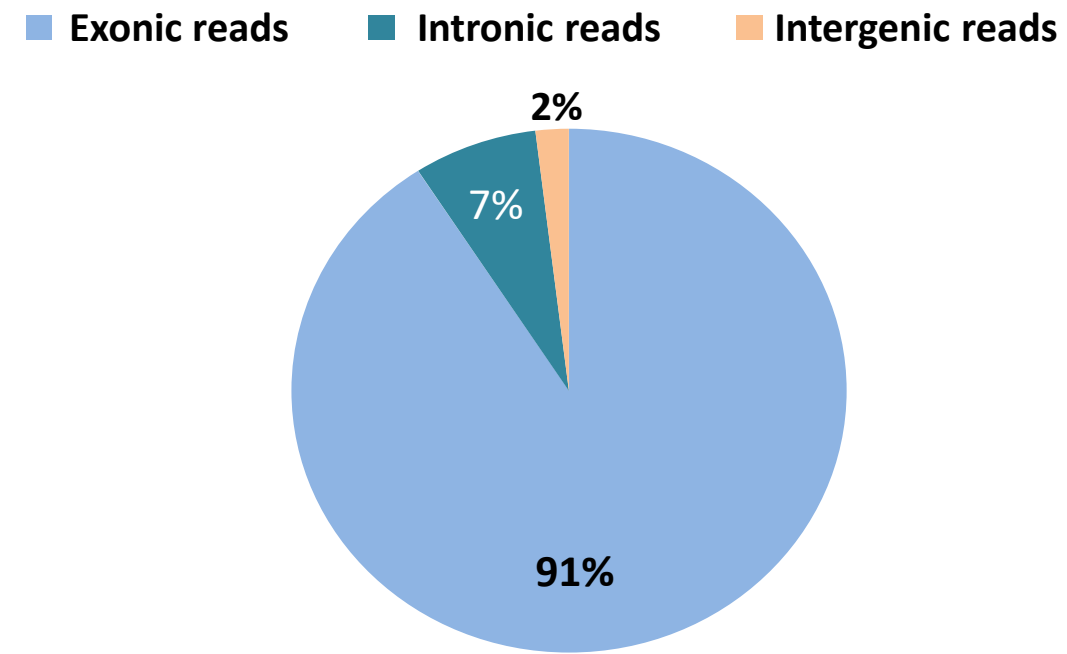

Averaged Percent Distribution of Human Kidney RNA-seq Reads

# S1B

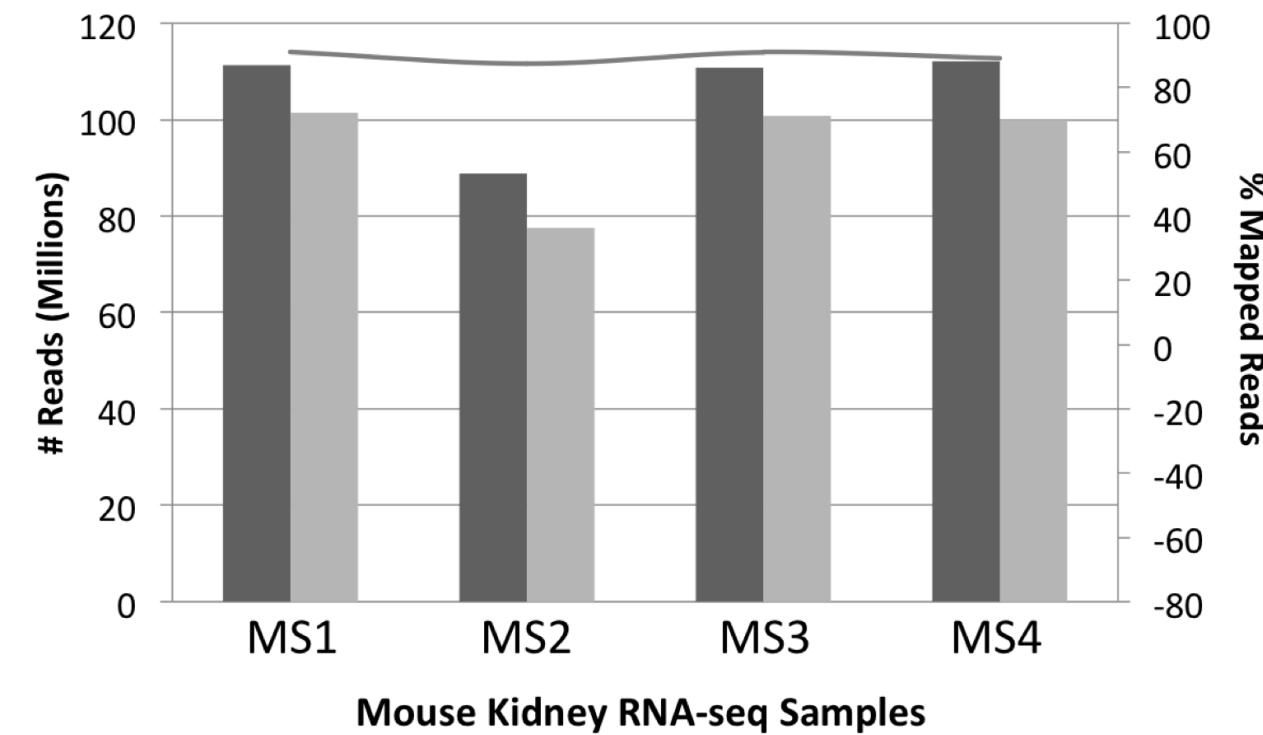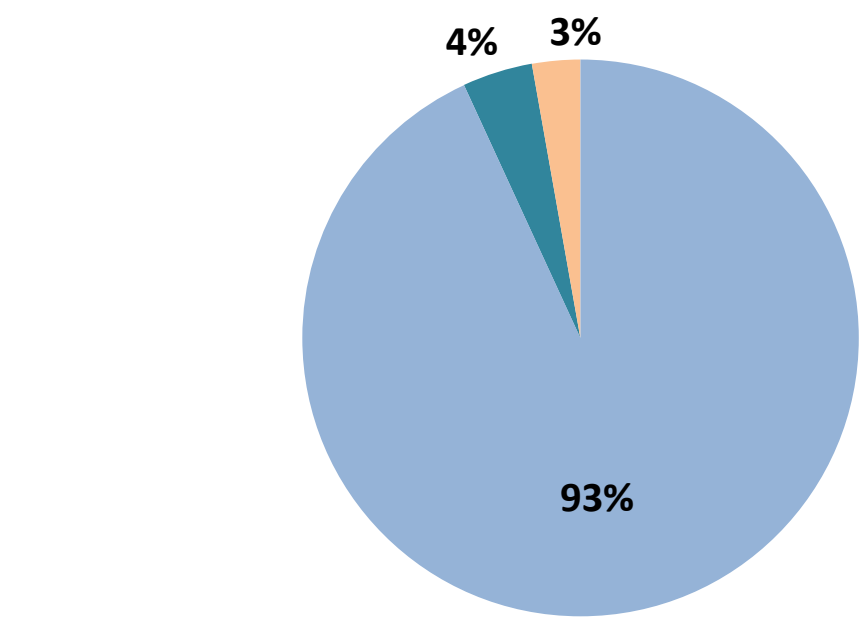

Averaged Percent Distribution of Mouse Kidney RNA-seq Reads

## S2A

### Human Sample Clustering

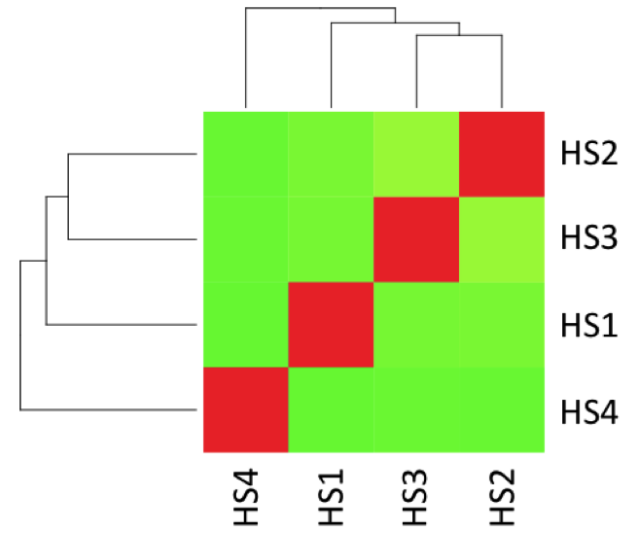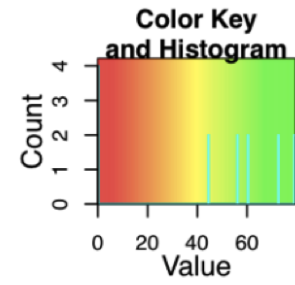

### Mouse Sample Clustering

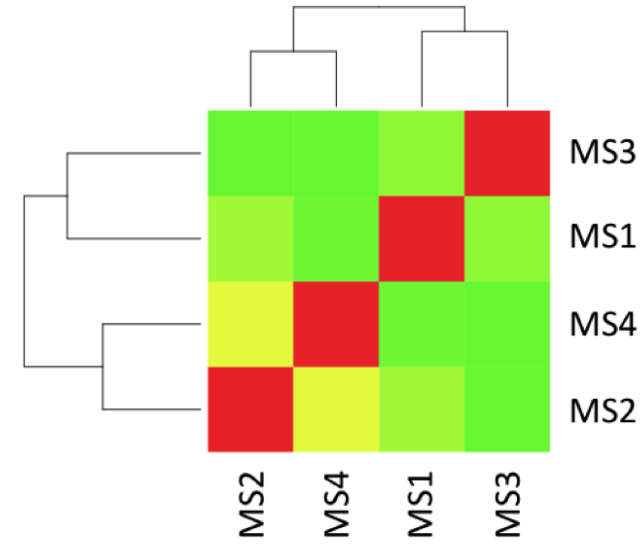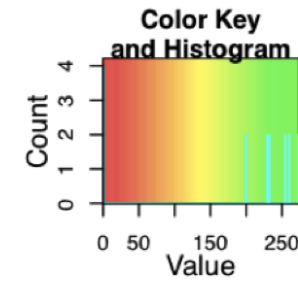

## S2B

### Human Gene Expression

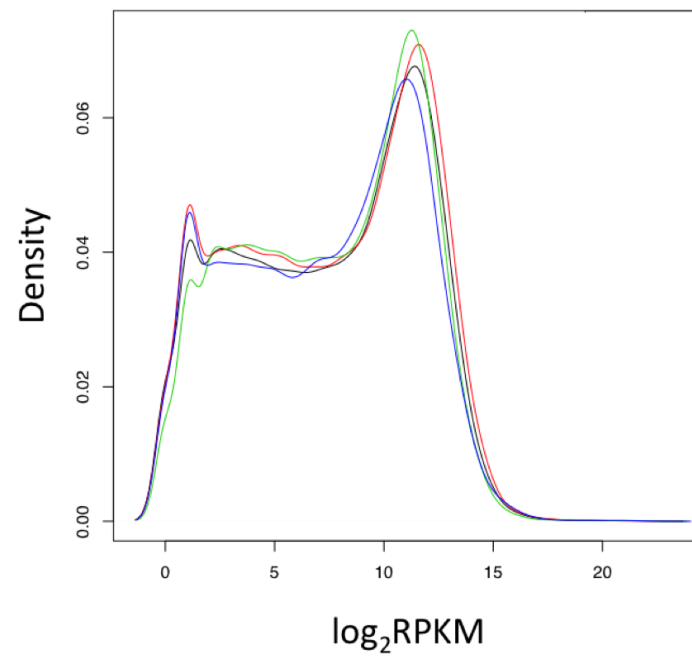

### Mouse Gene Expression

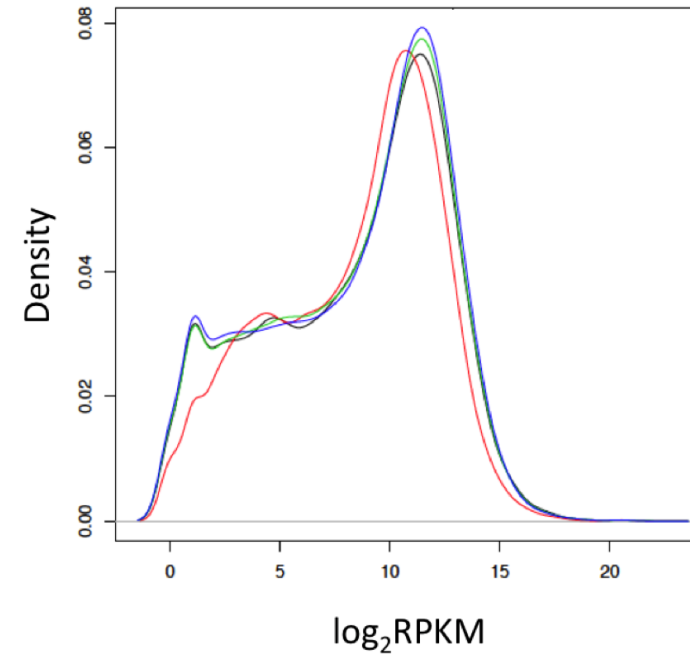

S3

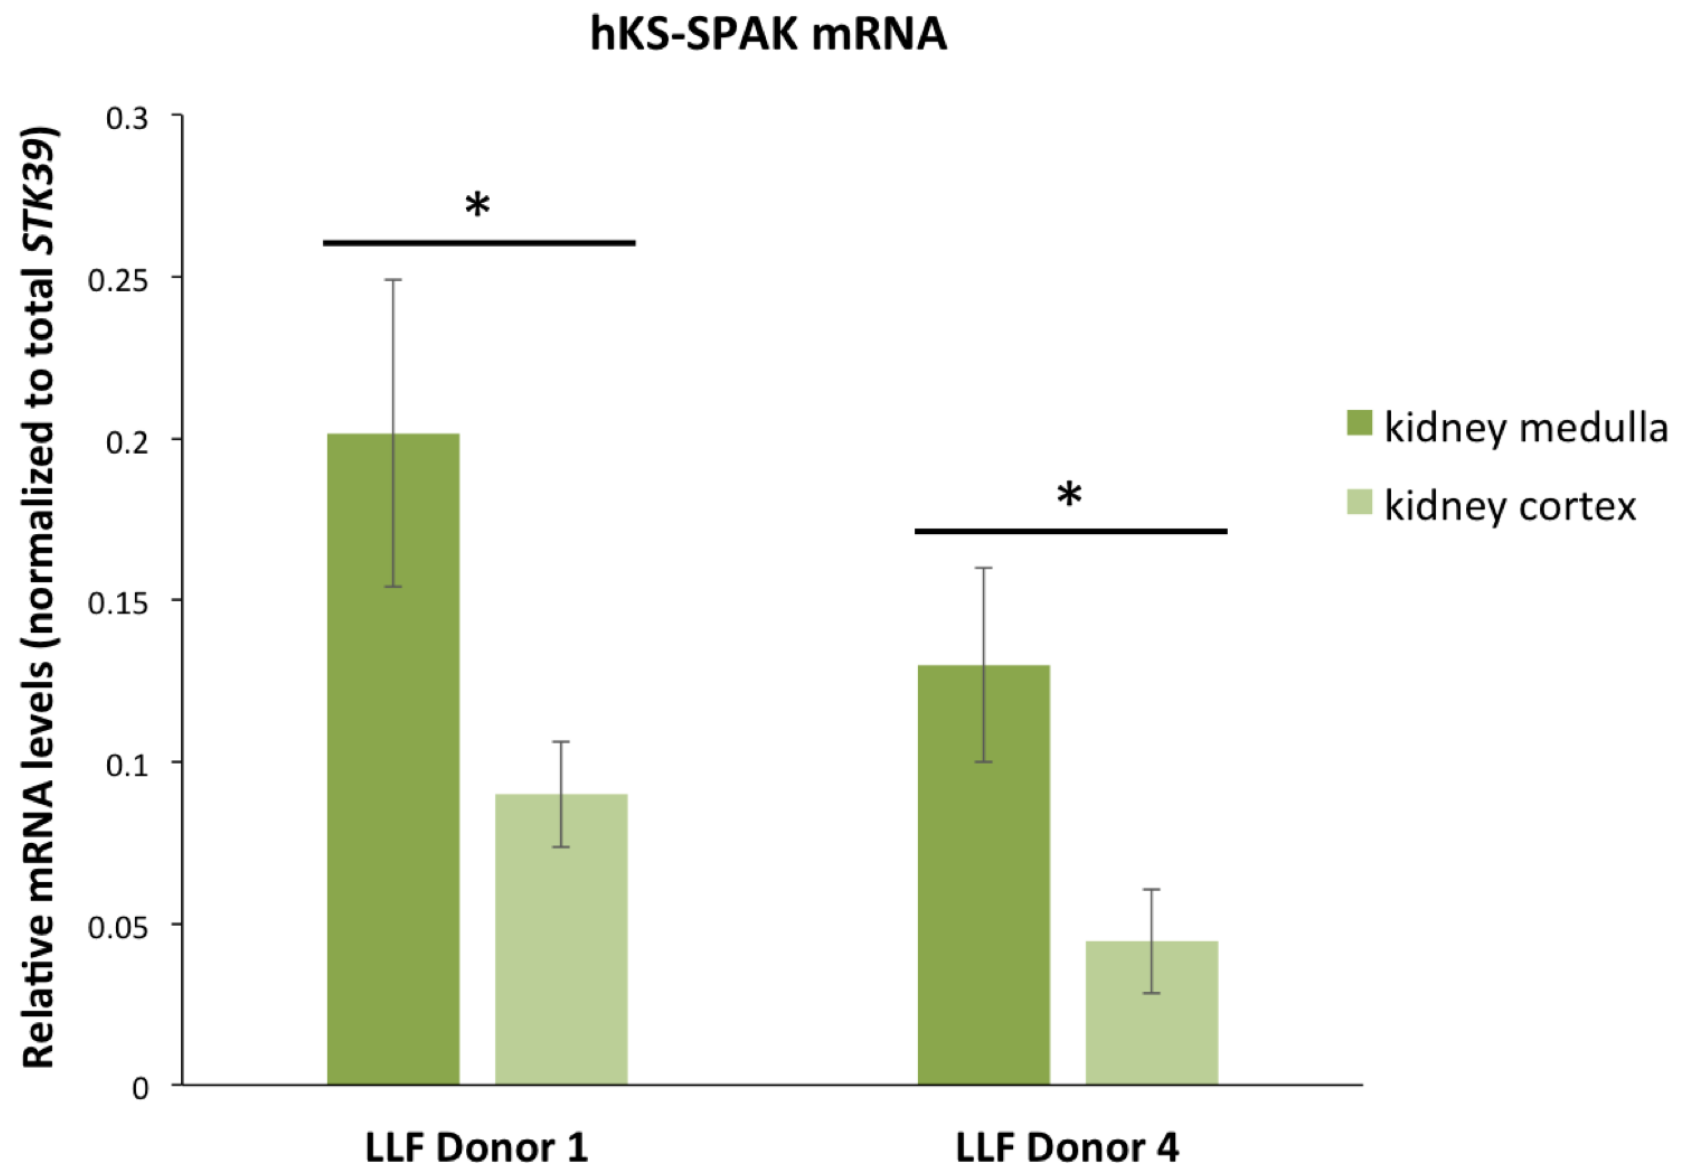

Supplement: PHY2-8-e14379-s001.pdf [file PHY2-8-e14379-s001.pdf]
